# Supplementary material
Source: publisher site journal article supplement (https://www.dovepress.com/article/447645)

**Supplementary Tables and Figures**

**Supplementary Table 1 -** Downregulated miRNAs in PC-3 and Du-145 compared to LNCaP cells

| **Downregulated miRNAs** | **log2FoldChange** | **-log10(padj)** |
| --- | --- | --- |
| hsa-miR-99a-5p | -7.971 | 2.824 |
| hsa-miR-200c-3p | -6.556 | 2.826 |
| hsa-let-7c-5p | -6.547 | 4.173 |
| hsa-miR-148a-3p | -5.777 | 5.377 |
| hsa-miR-141-3p | -5.094 | 3.538 |
| hsa-miR-34a-5p | -3.611 | 3.582 |
| hsa-miR-4454+hsa-miR-7975 | -3.390 | 2.140 |
| hsa-miR-203a-3p | -2.763 | 3.356 |
| hsa-miR-497-5p | -2.707 | 4.667 |
| hsa-miR-29c-3p | -2.379 | 3.457 |
| hsa-miR-1973 | -2.168 | 1.330 |
| hsa-miR-539-5p | -2.086 | 1.495 |
| hsa-let-7b-5p | -1.950 | 1.968 |
| hsa-miR-193b-3p | -1.825 | 2.576 |
| hsa-miR-663a | -1.800 | 2.352 |
| hsa-miR-493-3p | -1.751 | 1.306 |
| hsa-miR-1260a | -1.696 | 2.359 |
| hsa-miR-324-5p | -1.691 | 2.642 |
| hsa-miR-135a-5p | -1.614 | 2.576 |
| hsa-miR-340-5p | -1.593 | 3.900 |
| hsa-miR-1246 | -1.474 | 2.140 |
| hsa-miR-195-5p | -1.406 | 2.058 |
| hsa-miR-105-5p | -1.356 | 2.113 |
| hsa-miR-1269b | -1.343 | 2.225 |
| hsa-miR-769-5p | -1.237 | 2.066 |
| hsa-miR-26a-5p | -1.180 | 1.560 |
| hsa-miR-200b-3p | -1.131 | 2.735 |
| hsa-miR-425-5p | -1.040 | 2.330 |
| hsa-miR-429 | -0.926 | 2.122 |
| hsa-miR-664a-3p | -0.912 | 2.053 |
| hsa-miR-132-3p | -0.832 | 2.037 |
| hsa-miR-874-5p | -0.799 | 1.487 |
| hsa-miR-148b-3p | -0.739 | 2.140 |
| hsa-miR-186-5p | -0.735 | 1.784 |
| hsa-miR-362-5p | -0.681 | 1.684 |
| hsa-miR-18a-5p | -0.646 | 1.560 |

**Supplementary Table 2** - Upregulated miRNAs in PC-3 and Du-145 compared to LNCaP cells

| **Upregulated miRNAs** | **log2FoldChange** | **-log10(padj)** |
| --- | --- | --- |
| hsa-miR-1266-5p | 0.600 | 1.442 |
| hsa-miR-210-5p | 0.611 | 1.667 |
| hsa-miR-450b-3p | 0.639 | 1.376 |
| hsa-miR-1206 | 0.643 | 2.141 |
| hsa-miR-301b-5p | 0.665 | 1.306 |
| hsa-miR-196a-3p | 0.672 | 1.611 |
| hsa-miR-521 | 0.677 | 1.412 |
| hsa-miR-942-5p | 0.679 | 2.122 |
| hsa-miR-302d-3p | 0.688 | 1.563 |
| hsa-miR-577 | 0.697 | 1.862 |
| hsa-miR-573 | 0.708 | 1.684 |
| hsa-miR-517a-3p | 0.708 | 1.575 |
| hsa-miR-2116-5p | 0.709 | 1.330 |
| hsa-miR-122-5p | 0.717 | 3.013 |
| hsa-miR-933 | 0.722 | 1.330 |
| hsa-miR-519c-3p | 0.723 | 1.524 |
| hsa-miR-412-3p | 0.729 | 1.441 |
| hsa-miR-548v | 0.735 | 1.609 |
| hsa-miR-512-5p | 0.736 | 1.662 |
| hsa-miR-514b-5p | 0.759 | 1.306 |
| hsa-miR-369-3p | 0.762 | 1.349 |
| hsa-miR-370-3p | 0.777 | 1.441 |
| hsa-miR-3144-3p | 0.787 | 1.684 |
| hsa-miR-127-3p | 0.790 | 1.641 |
| hsa-miR-802 | 0.796 | 1.325 |
| hsa-miR-1255b-5p | 0.810 | 1.330 |
| hsa-miR-612 | 0.831 | 1.523 |
| hsa-miR-1234-3p | 0.858 | 1.495 |
| hsa-miR-183-5p | 0.859 | 3.187 |
| hsa-miR-876-3p | 0.860 | 2.115 |
| hsa-miR-151a-5p | 0.860 | 2.122 |
| hsa-miR-302e | 0.864 | 1.434 |
| hsa-miR-1909-3p | 0.873 | 2.066 |
| hsa-miR-526a+hsa-miR-518c-5p+hsa-miR-518d-5p | 0.883 | 1.968 |
| hsa-miR-1178-3p | 0.896 | 1.441 |
| hsa-miR-224-5p | 0.920 | 1.575 |
| hsa-miR-25-5p | 0.943 | 1.666 |
| hsa-miR-608 | 0.956 | 2.391 |
| hsa-miR-548ah-5p | 0.965 | 1.370 |
| hsa-miR-1236-3p | 0.975 | 2.141 |
| hsa-miR-4755-5p | 0.977 | 1.392 |
| hsa-miR-486-3p | 0.980 | 1.621 |
| hsa-miR-96-5p | 0.995 | 1.611 |
| hsa-miR-616-3p | 1.012 | 1.478 |
| hsa-miR-548d-5p | 1.018 | 1.524 |
| hsa-miR-503-3p | 1.018 | 3.383 |
| hsa-miR-151a-3p | 1.052 | 1.703 |
| hsa-miR-381-3p | 1.066 | 2.308 |
| hsa-miR-595 | 1.082 | 2.576 |
| hsa-miR-4536-5p | 1.110 | 2.141 |
| hsa-miR-449c-5p | 1.112 | 1.868 |
| hsa-miR-1268b | 1.135 | 1.661 |
| hsa-miR-208b-3p | 1.135 | 3.003 |
| hsa-miR-655-3p | 1.158 | 1.727 |
| hsa-miR-338-5p | 1.193 | 2.107 |
| hsa-miR-770-5p | 1.198 | 2.225 |
| hsa-miR-542-3p | 1.214 | 1.621 |
| hsa-miR-193a-5p+hsa-miR-193b-5p | 1.223 | 1.571 |
| hsa-miR-487b-5p | 1.262 | 1.968 |
| hsa-miR-549a | 1.337 | 1.783 |
| hsa-miR-376a-2-5p | 1.382 | 2.122 |
| hsa-miR-766-5p | 1.391 | 1.817 |
| hsa-miR-377-3p | 1.417 | 1.789 |
| hsa-miR-181a-3p | 1.432 | 2.735 |
| hsa-miR-1277-3p | 1.494 | 2.330 |
| hsa-miR-548m | 1.570 | 2.617 |
| hsa-miR-221-5p | 1.636 | 2.812 |
| hsa-miR-455-5p | 1.782 | 1.575 |
| hsa-miR-21-5p | 1.959 | 1.330 |
| hsa-miR-34c-3p | 2.023 | 1.409 |
| hsa-miR-181c-5p | 2.101 | 1.560 |
| hsa-miR-625-5p | 2.179 | 3.314 |
| hsa-let-7i-5p | 2.504 | 3.622 |
| hsa-miR-24-3p | 2.650 | 4.358 |
| hsa-miR-196a-5p | 2.692 | 2.141 |
| hsa-miR-450a-5p | 2.702 | 1.864 |
| hsa-miR-196b-5p | 2.816 | 2.912 |
| hsa-miR-181b-5p+hsa-miR-181d-5p | 2.831 | 3.900 |
| hsa-miR-29b-3p | 2.998 | 3.979 |
| hsa-miR-29a-3p | 3.099 | 4.710 |
| hsa-miR-10a-5p | 3.210 | 2.534 |
| hsa-miR-181a-5p | 3.529 | 3.622 |
| hsa-miR-31-5p | 3.537 | 3.539 |
| hsa-miR-221-3p | 3.994 | 2.147 |
| hsa-miR-503-5p | 4.047 | 1.409 |
| hsa-miR-23a-3p | 4.155 | 4.752 |
| hsa-miR-424-5p | 4.166 | 4.710 |
| hsa-miR-222-3p | 4.880 | 2.812 |
| hsa-miR-135b-5p | 5.437 | 3.337 |
| hsa-miR-130a-3p | 5.673 | 3.979 |

**Supplementary Table 3** - Compartments data enrichment analysis for terms with FDR P value <0.05 related to the cluster derived from the targets of the downregulated miRNAs.

| **Number of Genes** | **Term Name** | **Description** | **FDR value** |
| --- | --- | --- | --- |
| 17 | GOCC:0098797 | Plasma membrane protein complex | 9.53E-13 |
| 5 | GOCC:0016324 | Apical plasma membrane | 8.0E-4 |
| 12 | GOCC:0005794 | Golgi apparatus | 8.06E-6 |
| 5 | GOCC:0031256 | Leading edge membrane | 7.35E-5 |
| 15 | GOCC:0005615 | Extracellular space | 2.59E-8 |
| 4 | GOCC:0005901 | Caveola | 1.8E-4 |
| 6 | GOCC:0030666 | Endocytic vesicle membrane | 1.3E-5 |
| 10 | GOCC:0005856 | Cytoskeleton | 0.0206 |
| 4 | GOCC:0005802 | trans-Golgi network | 0.0166 |
| 4 | GOCC:0016323 | Basolateral plasma membrane | 0.0048 |
| 5 | GOCC:0005770 | Late endosome | 0.0019 |

**Supplementary Table 4** – Gene Ontology (GO) Biological Processes data enrichment analysis for terms with FDR P value <0.05 related to the cluster derived from the targets of the downregulated miRNAs.

| **Number of Genes** | **Term Name** | **Description** | **FDR value** |
| --- | --- | --- | --- |
| 23 | GO:1902533 | Positive regulation of intracellular signal transduction | 1.47E-15 |
| 12 | GO:0051896 | Regulation of protein kinase b signaling | 6.99E-12 |
| 15 | GO:0048729 | Tissue morphogenesis | 3.33E-11 |
| 16 | GO:0030155 | Regulation of cell adhesion | 5.2E-11 |
| 16 | GO:0010942 | Positive regulation of cell death | 5.86E-11 |
| 17 | GO:0051050 | Positive regulation of transport | 1.57E-10 |
| 17 | GO:0044087 | Regulation of cellular component biogenesis | 3.18E-10 |
| 17 | GO:0007417 | Central nervous system development | 4.09E-10 |
| 12 | GO:0071396 | Cellular response to lipid | 4.14E-8 |
| 10 | GO:0050900 | Leukocyte migration | 6.53E-8 |
| 7 | GO:0051492 | Regulation of stress fiber assembly | 7.37E-8 |
| 8 | GO:0051701 | Interaction with host | 8.02E-8 |
| 6 | GO:0031295 | T cell costimulation | 1.83E-7 |
| 11 | GO:0022604 | Regulation of cell morphogenesis | 2.67E-7 |
| 7 | GO:0042552 | Myelination | 2.67E-7 |
| 8 | GO:2000377 | Regulation of reactive oxygen species metabolic process | 3.46E-7 |
| 15 | GO:0071495 | Cellular response to endogenous stimulus | 3.56E-7 |
| 14 | GO:0032101 | Regulation of response to external stimulus | 4.59E-7 |
| 10 | GO:0048514 | Blood vessel morphogenesis | 5.67E-7 |
| 17 | GO:0042592 | Homeostatic process | 6.33E-7 |
| 11 | GO:0060627 | Regulation of vesicle-mediated transport | 6.65E-7 |
| 8 | GO:0009612 | Response to mechanical stimulus | 7.87E-7 |
| 7 | GO:0033135 | Regulation of peptidyl-serine phosphorylation | 1.4E-6 |
| 12 | GO:0051345 | Positive regulation of hydrolase activity | 1.84E-6 |
| 13 | GO:0009887 | Animal organ morphogenesis | 2.24E-6 |
| 14 | GO:0030030 | Cell projection organization | 2.43E-6 |
| 7 | GO:0050714 | Positive regulation of protein secretion | 3.14E-6 |
| 9 | GO:0032147 | Activation of protein kinase activity | 3.53E-6 |
| 9 | GO:0008015 | Blood circulation | 4.99E-6 |
| 4 | GO:2000811 | Negative regulation of anoikis | 5.62E-6 |
| 7 | GO:0050679 | Positive regulation of epithelial cell proliferation | 7.29E-6 |
| 7 | GO:0071219 | Cellular response to molecule of bacterial origin | 7.98E-6 |
| 16 | GO:0016192 | Vesicle-mediated transport | 1.03E-5 |
| 14 | GO:0050877 | Nervous system process | 1.19E-5 |
| 8 | GO:0043010 | Camera-type eye development | 1.25E-5 |
| 5 | GO:0043542 | Endothelial cell migration | 1.64E-5 |
| 8 | GO:1901342 | Regulation of vasculature development | 1.84E-5 |
| 12 | GO:0051093 | Negative regulation of developmental process | 1.91E-5 |
| 9 | GO:1901652 | Response to peptide | 2.06E-5 |
| 9 | GO:0050769 | Positive regulation of neurogenesis | 2.11E-5 |
| 5 | GO:0060193 | Positive regulation of lipase activity | 2.61E-5 |
| 13 | GO:0051726 | Regulation of cell cycle | 2.67E-5 |
| 10 | GO:0002520 | Immune system development | 2.69E-5 |
| 7 | GO:0050730 | Regulation of peptidyl-tyrosine phosphorylation | 4.07E-5 |
| 6 | GO:2001236 | Regulation of extrinsic apoptotic signaling pathway | 4.35E-5 |
| 10 | GO:0008285 | Negative regulation of cell population proliferation | 4.5E-5 |
| 5 | GO:0048013 | Ephrin receptor signaling pathway | 4.55E-5 |
| 12 | GO:0051248 | Negative regulation of protein metabolic process | 5.11E-5 |
| 5 | GO:0003158 | Endothelium development | 5.23E-5 |
| 7 | GO:0007162 | Negative regulation of cell adhesion | 6.41E-5 |
| 11 | GO:0022610 | Biological adhesion | 7.26E-5 |
| 5 | GO:1901216 | Positive regulation of neuron death | 7.82E-5 |
| 5 | GO:0022612 | Gland morphogenesis | 8.13E-5 |
| 6 | GO:0046328 | Regulation of jnk cascade | 8.13E-5 |
| 7 | GO:0070372 | Regulation of erk1 and erk2 cascade | 8.13E-5 |
| 5 | GO:1901890 | Positive regulation of cell junction assembly | 9.2E-5 |
| 5 | GO:1903076 | Regulation of protein localization to plasma membrane | 9.99E-5 |
| 8 | GO:0042391 | Regulation of membrane potential | 1.0E-4 |
| 8 | GO:0050804 | Modulation of chemical synaptic transmission | 1.1E-4 |
| 14 | GO:1903508 | Positive regulation of nucleic acid-templated transcription | 1.1E-4 |
| 6 | GO:1901654 | Response to ketone | 1.2E-4 |
| 11 | GO:0071345 | Cellular response to cytokine stimulus | 1.5E-4 |
| 4 | GO:0030301 | Cholesterol transport | 1.9E-4 |
| 4 | GO:0010676 | Positive regulation of cellular carbohydrate metabolic process | 2.5E-4 |
| 8 | GO:0010035 | Response to inorganic substance | 3.7E-4 |
| 5 | GO:0007612 | Learning | 4.0E-4 |
| 5 | GO:0050921 | Positive regulation of chemotaxis | 4.2E-4 |
| 7 | GO:0022411 | Cellular component disassembly | 4.5E-4 |
| 3 | GO:1904886 | Beta-catenin destruction complex disassembly | 4.6E-4 |
| 5 | GO:0071346 | Cellular response to interferon-gamma | 6.0E-4 |
| 6 | GO:0014706 | Striated muscle tissue development | 6.6E-4 |
| 7 | GO:0010256 | Endomembrane system organization | 6.7E-4 |
| 7 | GO:0019216 | Regulation of lipid metabolic process | 6.7E-4 |
| 2 | GO:0032707 | Negative regulation of interleukin-23 production | 6.8E-4 |
| 4 | GO:0048015 | Phosphatidylinositol-mediated signaling | 6.8E-4 |
| 6 | GO:0043270 | Positive regulation of ion transport | 7.1E-4 |
| 5 | GO:0043409 | Negative regulation of mapk cascade | 7.1E-4 |
| 7 | GO:0006897 | Endocytosis | 7.4E-4 |
| 5 | GO:0021543 | Pallium development | 7.7E-4 |
| 6 | GO:0007204 | Positive regulation of cytosolic calcium ion concentration | 8.7E-4 |
| 5 | GO:0008361 | Regulation of cell size | 0.001 |
| 6 | GO:0060562 | Epithelial tube morphogenesis | 0.001 |
| 2 | GO:1903598 | Positive regulation of gap junction assembly | 0.0011 |
| 3 | GO:1901889 | Negative regulation of cell junction assembly | 0.0013 |
| 3 | GO:0030032 | Lamellipodium assembly | 0.0014 |
| 5 | GO:0071695 | Anatomical structure maturation | 0.0014 |
| 7 | GO:0008283 | Cell population proliferation | 0.0015 |
| 3 | GO:0043552 | Positive regulation of phosphatidylinositol 3-kinase activity | 0.0015 |
| 4 | GO:0048259 | Regulation of receptor-mediated endocytosis | 0.0015 |
| 5 | GO:0006909 | Phagocytosis | 0.0017 |
| 3 | GO:0033619 | Membrane protein proteolysis | 0.002 |
| 2 | GO:0090244 | Wnt signaling pathway involved in somitogenesis | 0.002 |
| 6 | GO:0032386 | Regulation of intracellular transport | 0.0021 |
| 3 | GO:0001937 | Negative regulation of endothelial cell proliferation | 0.0025 |
| 2 | GO:0008354 | Germ cell migration | 0.0025 |
| 3 | GO:0045933 | Positive regulation of muscle contraction | 0.0026 |
| 5 | GO:0097305 | Response to alcohol | 0.0026 |
| 3 | GO:0014003 | Oligodendrocyte development | 0.0028 |
| 3 | GO:0035272 | Exocrine system development | 0.0029 |
| 3 | GO:0051898 | Negative regulation of protein kinase b signaling | 0.0029 |
| 6 | GO:0046649 | Lymphocyte activation | 0.003 |
| 14 | GO:0022607 | Cellular component assembly | 0.0032 |
| 3 | GO:0031952 | Regulation of protein autophosphorylation | 0.0034 |
| 4 | GO:1900180 | Regulation of protein localization to nucleus | 0.0034 |
| 3 | GO:1905207 | Regulation of cardiocyte differentiation | 0.0034 |
| 10 | GO:0007186 | G protein-coupled receptor signaling pathway | 0.0036 |
| 3 | GO:0002011 | Morphogenesis of an epithelial sheet | 0.0037 |
| 4 | GO:0035637 | Multicellular organismal signaling | 0.0039 |
| 3 | GO:0006968 | Cellular defense response | 0.0043 |
| 2 | GO:0002645 | Positive regulation of tolerance induction | 0.0044 |
| 3 | GO:0022029 | Telencephalon cell migration | 0.0047 |
| 2 | GO:0060907 | Positive regulation of macrophage cytokine production | 0.0051 |
| 4 | GO:0071560 | Cellular response to transforming growth factor beta stimulus | 0.0051 |
| 3 | GO:0090303 | Positive regulation of wound healing | 0.0052 |
| 5 | GO:0050808 | Synapse organization | 0.0054 |
| 4 | GO:0030902 | Hindbrain development | 0.0055 |
| 2 | GO:1903961 | Positive regulation of anion transmembrane transport | 0.0057 |
| 2 | GO:2000392 | Regulation of lamellipodium morphogenesis | 0.0057 |
| 4 | GO:0051092 | Positive regulation of nf-kappab transcription factor activity | 0.0059 |
| 4 | GO:0061138 | Morphogenesis of a branching epithelium | 0.006 |
| 2 | GO:0042532 | Negative regulation of tyrosine phosphorylation of stat protein | 0.0065 |
| 4 | GO:0031960 | Response to corticosteroid | 0.0066 |
| 2 | GO:0007494 | Midgut development | 0.0072 |
| 2 | GO:0048548 | Regulation of pinocytosis | 0.0072 |
| 2 | GO:0050966 | Detection of mechanical stimulus involved in sensory perception of pain | 0.0081 |
| 3 | GO:0032024 | Positive regulation of insulin secretion | 0.0087 |
| 3 | GO:0007422 | Peripheral nervous system development | 0.0089 |
| 2 | GO:0044764 | Multi-organism cellular process | 0.0089 |
| 5 | GO:0048638 | Regulation of developmental growth | 0.0096 |
| 2 | GO:1902992 | Negative regulation of amyloid precursor protein catabolic process | 0.0098 |
| 5 | GO:0030198 | Extracellular matrix organization | 0.0101 |
| 5 | GO:0022412 | Cellular process involved in reproduction in multicellular organism | 0.011 |
| 4 | GO:0010821 | Regulation of mitochondrion organization | 0.0114 |
| 4 | GO:0051302 | Regulation of cell division | 0.0115 |
| 4 | GO:0010952 | Positive regulation of peptidase activity | 0.0117 |
| 4 | GO:0060348 | Bone development | 0.0118 |
| 2 | GO:2000641 | Regulation of early endosome to late endosome transport | 0.0128 |
| 3 | GO:0110110 | Positive regulation of animal organ morphogenesis | 0.0133 |
| 2 | GO:0031998 | Regulation of fatty acid beta-oxidation | 0.0139 |
| 13 | GO:0033036 | Macromolecule localization | 0.0139 |
| 8 | GO:0009894 | Regulation of catabolic process | 0.0155 |
| 2 | GO:0051957 | Positive regulation of amino acid transport | 0.0158 |
| 4 | GO:0017157 | Regulation of exocytosis | 0.0163 |
| 2 | GO:0048714 | Positive regulation of oligodendrocyte differentiation | 0.0169 |
| 2 | GO:0051894 | Positive regulation of focal adhesion assembly | 0.0193 |
| 2 | GO:0030225 | Macrophage differentiation | 0.0204 |
| 2 | GO:0050927 | Positive regulation of positive chemotaxis | 0.0204 |
| 2 | GO:0070723 | Response to cholesterol | 0.0218 |
| 2 | GO:0033137 | Negative regulation of peptidyl-serine phosphorylation | 0.023 |
| 2 | GO:0001964 | Startle response | 0.0242 |
| 2 | GO:0051590 | Positive regulation of neurotransmitter transport | 0.0242 |
| 4 | GO:0030336 | Negative regulation of cell migration | 0.0267 |
| 5 | GO:0051051 | Negative regulation of transport | 0.0267 |
| 2 | GO:0035025 | Positive regulation of rho protein signal transduction | 0.0294 |
| 2 | GO:0008045 | Motor neuron axon guidance | 0.0309 |
| 2 | GO:0061384 | Heart trabecula morphogenesis | 0.0324 |
| 2 | GO:0090049 | Regulation of cell migration involved in sprouting angiogenesis | 0.0366 |
| 2 | GO:0014911 | Positive regulation of smooth muscle cell migration | 0.0381 |
| 2 | GO:1904646 | Cellular response to amyloid-beta | 0.0381 |
| 3 | GO:0060041 | Retina development in camera-type eye | 0.0383 |
| 2 | GO:0061900 | Glial cell activation | 0.0413 |
| 2 | GO:1901998 | Toxin transport | 0.0413 |
| 8 | GO:0006508 | Proteolysis | 0.0416 |
| 3 | GO:0045580 | Regulation of t cell differentiation | 0.0416 |
| 5 | GO:0006518 | Peptide metabolic process | 0.042 |
| 3 | GO:0010977 | Negative regulation of neuron projection development | 0.0444 |
| 2 | GO:0045806 | Negative regulation of endocytosis | 0.0444 |
| 3 | GO:0010970 | Transport along microtubule | 0.0469 |
| 3 | GO:0016236 | Macroautophagy | 0.0476 |

**Supplementary Table 5 -** Gene Ontology (GO) Cellular Components data enrichment analysis for terms with FDR P value <0.05 related to the cluster derived from the targets of the downregulated miRNAs.

| **Number of Genes** | **Term Name** | **Description** | **FDR value** |
| --- | --- | --- | --- |
| 35 | GO:0005768 | Endosome | 2.33E-37 |
| 19 | GO:0009986 | Cell surface | 6.5E-14 |
| 14 | GO:0045121 | Membrane raft | 2.94E-13 |
| 18 | GO:0070161 | Anchoring junction | 8.36E-13 |
| 11 | GO:0031901 | Early endosome membrane | 2.88E-12 |
| 17 | GO:0030659 | Cytoplasmic vesicle membrane | 4.43E-12 |
| 14 | GO:0031252 | Cell leading edge | 6.54E-12 |
| 19 | GO:0098590 | Plasma membrane region | 3.37E-11 |
| 9 | GO:0055037 | Recycling endosome | 7.01E-9 |
| 17 | GO:0045202 | Synapse | 1.79E-8 |
| 13 | GO:0048471 | Perinuclear region of cytoplasm | 5.8E-8 |
| 9 | GO:0030139 | Endocytic vesicle | 3.78E-7 |
| 7 | GO:0043197 | Dendritic spine | 2.45E-6 |
| 10 | GO:0098552 | Side of membrane | 3.04E-6 |
| 8 | GO:0030667 | Secretory granule membrane | 5.2E-6 |
| 10 | GO:0044297 | Cell body | 7.28E-6 |
| 5 | GO:0032587 | Ruffle membrane | 3.89E-5 |
| 8 | GO:0045177 | Apical part of cell | 5.03E-5 |
| 9 | GO:0030424 | Axon | 1.3E-4 |
| 9 | GO:0000139 | Golgi membrane | 4.3E-4 |
| 4 | GO:0030670 | Phagocytic vesicle membrane | 4.4E-4 |
| 9 | GO:0005773 | Vacuole | 5.6E-4 |
| 5 | GO:0098802 | Plasma membrane signaling receptor complex | 5.6E-4 |
| 4 | GO:0030175 | Filopodium | 0.0015 |
| 4 | GO:0043296 | Apical junction complex | 0.0042 |
| 4 | GO:0042734 | Presynaptic membrane | 0.006 |
| 3 | GO:0044291 | Cell-cell contact zone | 0.0084 |
| 5 | GO:0098984 | Neuron to neuron synapse | 0.016 |
| 2 | GO:0043198 | Dendritic shaft | 0.0445 |

**Supplementary Table 6 -** Gene Ontology (GO) Molecular Function data enrichment analysis for terms with FDR P value <0.05 related to the cluster derived from the targets of the downregulated miRNAs.

| **Number of Genes** | **Term Name** | **Description** | **FDR value** |
| --- | --- | --- | --- |
| 13 | GO:0044877 | Protein-containing complex binding | 8.58E-5 |
| 5 | GO:0001540 | Amyloid-beta binding | 9.18E-5 |
| 5 | GO:0051117 | ATPase binding | 1.4E-4 |
| 14 | GO:0042802 | Identical protein binding | 9.6E-4 |
| 9 | GO:0008289 | Lipid binding | 0.0013 |
| 2 | GO:0051022 | Rho GDP-dissociation inhibitor binding | 0.0025 |
| 15 | GO:0016787 | Hydrolase activity | 0.0028 |
| 8 | GO:0046983 | Protein dimerization activity | 0.0477 |

**Supplementary Table 7 –** KEGG pathways enrichment analysis for terms with FDR P value <0.05 related to the cluster derived from the targets of the downregulated miRNAs.

| **Number of Genes** | **Term Name** | **Description** | **FDR value** |
| --- | --- | --- | --- |
| 10 | hsa04144 | Endocytosis | 5.02E-9 |
| 11 | hsa04151 | PI3K-Akt signaling pathway | 6.83E-9 |
| 7 | hsa04520 | Adherens junction | 7.71E-9 |
| 8 | hsa04530 | Tight junction | 5.19E-8 |
| 8 | hsa05131 | Shigellosis | 5.18E-7 |
| 5 | hsa04068 | FoxO signaling pathway | 1.0E-4 |
| 5 | hsa04072 | Phospholipase D signaling pathway | 1.7E-4 |
| 5 | hsa05225 | Hepatocellular carcinoma | 2.2E-4 |
| 5 | hsa04360 | Axon guidance | 3.1E-4 |
| 4 | hsa05142 | Chagas disease | 4.9E-4 |
| 4 | hsa04722 | Neurotrophin signaling pathway | 7.4E-4 |
| 4 | hsa05206 | MicroRNAs in cancer | 0.0022 |
| 3 | hsa04390 | Hippo signaling pathway | 0.0174 |
| 2 | hsa02010 | ABC transporters | 0.0181 |
| 2 | hsa05416 | Viral myocarditis | 0.025 |

**Supplementary Table 8 –** Reactome Pathways enrichment analysis for terms with FDR P value <0.05 related to the cluster derived from the targets of the downregulated miRNAs.

| **Number of Genes** | **Term Name** | **Description** | **FDR value** |
| --- | --- | --- | --- |
| 11 | HSA-5663202 | Diseases of signal transduction by growth factor receptors and second messengers | 1.42E-7 |
| 3 | HSA-9032500 | Activated NTRK2 signals through FYN | 1.4E-4 |
| 3 | HSA-5627123 | RHO GTPases activate PAKs | 0.0011 |
| 6 | HSA-5683057 | MAPK family signaling cascades | 0.0022 |
| 7 | HSA-199991 | Membrane Trafficking | 0.0078 |
| 2 | HSA-9013507 | NOTCH3 Activation and Transmission of Signal to the Nucleus | 0.0261 |

**Supplementary Table 9 -** Compartments data enrichment analysis for terms with FDR P value <0.05 related to the cluster derived from the targets of the upregulated miRNAs.

| **Number of Genes** | **Term Name** | **Description** | **FDR value** |
| --- | --- | --- | --- |
| 21 | GOCC:0005887 | Integral component of plasma membrane | 1.92E-15 |
| 19 | GOCC:0098590 | Plasma membrane region | 3.95E-14 |
| 15 | GOCC:0010008 | Endosome membrane | 8.81E-14 |
| 16 | GOCC:0009986 | Cell surface | 2.37E-13 |
| 14 | GOCC:0070062 | Extracellular exosome | 8.30E-12 |
| 10 | GOCC:0098802 | Plasma membrane signaling receptor complex | 1.67E-08 |
| 6 | GOCC:0016323 | Basolateral plasma membrane | 2.83E-05 |
| 12 | GOCC:0005794 | Golgi apparatus | 2.96E-05 |
| 5 | GOCC:0031256 | Leading edge membrane | 1.30E-04 |
| 5 | GOCC:0009897 | External side of plasma membrane | 2.00E-04 |
| 8 | GOCC:0045202 | Synapse | 6.10E-04 |
| 6 | GOCC:0005765 | Lysosomal membrane | 9.20E-04 |
| 4 | GOCC:0043296 | Apical junction complex | 0.0026 |
| 6 | GOCC:0015629 | Actin cytoskeleton | 0.0043 |
| 3 | GOCC:0055038 | Recycling endosome membrane | 0.0072 |
| 2 | GOCC:0060187 | Cell pole | 0.0116 |
| 3 | GOCC:0042383 | Sarcolemma | 0.0132 |
| 2 | GOCC:0036019 | Endolysosome | 0.0322 |
| 4 | GOCC:0031983 | Vesicle lumen | 0.0412 |

**Supplementary Table 10 -** Gene Ontology (GO) Biological Processes data enrichment analysis for terms with FDR P value <0.05 related to the cluster derived from the targets of the upregulated miRNAs.

| **Number of Genes** | **Term Name** | **Description** | **FDR value** |
| --- | --- | --- | --- |
| 19 | GO:0030335 | Positive regulation of cell migration | 2.14E-15 |
| 20 | GO:0043408 | Regulation of mapk cascade | 2.03E-14 |
| 30 | GO:0002376 | Immune system process | 3.18E-14 |
| 24 | GO:1901700 | Response to oxygen-containing compound | 9.24E-13 |
| 13 | GO:0051251 | Positive regulation of lymphocyte activation | 1.5E-11 |
| 17 | GO:0120035 | Regulation of plasma membrane bounded cell projection organization | 1.65E-11 |
| 23 | GO:0042127 | Regulation of cell population proliferation | 2.04E-11 |
| 12 | GO:0042063 | Gliogenesis | 2.58E-11 |
| 17 | GO:0007167 | Enzyme linked receptor protein signaling pathway | 3.02E-11 |
| 19 | GO:0060341 | Regulation of cellular localization | 5.15E-11 |
| 14 | GO:0060627 | Regulation of vesicle-mediated transport | 1.7E-09 |
| 21 | GO:0042592 | Homeostatic process | 2.09E-09 |
| 14 | GO:0048729 | Tissue morphogenesis | 2.1E-09 |
| 10 | GO:0009612 | Response to mechanical stimulus | 5.76E-09 |
| 12 | GO:0046649 | Lymphocyte activation | 6.56E-09 |
| 16 | GO:0014070 | Response to organic cyclic compound | 8.55E-09 |
| 9 | GO:0030307 | Positive regulation of cell growth | 2.03E-08 |
| 12 | GO:0042060 | Wound healing | 2.17E-08 |
| 9 | GO:0050679 | Positive regulation of epithelial cell proliferation | 5.02E-08 |
| 15 | GO:0043066 | Negative regulation of apoptotic process | 5.94E-08 |
| 10 | GO:0007162 | Negative regulation of cell adhesion | 6.32E-08 |
| 18 | GO:0080134 | Regulation of response to stress | 7.41E-08 |
| 9 | GO:0006909 | Phagocytosis | 9.79E-08 |
| 12 | GO:0032103 | Positive regulation of response to external stimulus | 0.0000001 |
| 12 | GO:0090066 | Regulation of anatomical structure size | 0.00000011 |
| 7 | GO:1903076 | Regulation of protein localization to plasma membrane | 0.000000359 |
| 8 | GO:0051897 | Positive regulation of protein kinase b signaling | 0.00000039 |
| 10 | GO:0051222 | Positive regulation of protein transport | 0.000000442 |
| 7 | GO:0042552 | Myelination | 0.000000541 |
| 7 | GO:0090175 | Regulation of establishment of planar polarity | 0.000000541 |
| 6 | GO:0051893 | Regulation of focal adhesion assembly | 0.000000655 |
| 12 | GO:0048534 | Hematopoietic or lymphoid organ development | 0.000000702 |
| 14 | GO:0007155 | Cell adhesion | 0.000000728 |
| 16 | GO:0051336 | Regulation of hydrolase activity | 0.000000754 |
| 12 | GO:1903530 | Regulation of secretion by cell | 0.000000831 |
| 6 | GO:1903036 | Positive regulation of response to wounding | 0.00000102 |
| 11 | GO:0006954 | Inflammatory response | 0.00000113 |
| 5 | GO:1901889 | Negative regulation of cell junction assembly | 0.00000113 |
| 8 | GO:0070374 | Positive regulation of erk1 and erk2 cascade | 0.00000159 |
| 9 | GO:0045765 | Regulation of angiogenesis | 0.00000165 |
| 9 | GO:1901214 | Regulation of neuron death | 0.00000232 |
| 7 | GO:0010634 | Positive regulation of epithelial cell migration | 0.00000283 |
| 6 | GO:0048013 | Ephrin receptor signaling pathway | 0.00000315 |
| 12 | GO:0045596 | Negative regulation of cell differentiation | 0.00000345 |
| 7 | GO:0008360 | Regulation of cell shape | 0.00000362 |
| 12 | GO:0007420 | Brain development | 0.00000425 |
| 10 | GO:1901652 | Response to peptide | 0.00000548 |
| 12 | GO:0016032 | Viral process | 0.00000636 |
| 11 | GO:0002366 | Leukocyte activation involved in immune response | 0.00000655 |
| 9 | GO:0032147 | Activation of protein kinase activity | 0.00000821 |
| 11 | GO:1901699 | Cellular response to nitrogen compound | 0.00000849 |
| 10 | GO:1902532 | Negative regulation of intracellular signal transduction | 0.00000912 |
| 5 | GO:0051496 | Positive regulation of stress fiber assembly | 0.00000913 |
| 7 | GO:0034341 | Response to interferon-gamma | 0.00000976 |
| 9 | GO:0048514 | Blood vessel morphogenesis | 0.0000155 |
| 9 | GO:0006897 | Endocytosis | 0.0000232 |
| 7 | GO:0043393 | Regulation of protein binding | 0.000024 |
| 5 | GO:0043542 | Endothelial cell migration | 0.0000242 |
| 6 | GO:0034614 | Cellular response to reactive oxygen species | 0.0000278 |
| 7 | GO:0050670 | Regulation of lymphocyte proliferation | 0.000028 |
| 9 | GO:0001819 | Positive regulation of cytokine production | 0.000036 |
| 7 | GO:0032872 | Regulation of stress-activated mapk cascade | 0.000036 |
| 9 | GO:0050769 | Positive regulation of neurogenesis | 0.0000477 |
| 11 | GO:0061024 | Membrane organization | 0.0000521 |
| 10 | GO:0009617 | Response to bacterium | 0.0000527 |
| 5 | GO:0048017 | Inositol lipid-mediated signaling | 0.0000585 |
| 7 | GO:0050730 | Regulation of peptidyl-tyrosine phosphorylation | 0.0000737 |
| 4 | GO:0014002 | Astrocyte development | 0.0000756 |
| 5 | GO:0003158 | Endothelium development | 0.0000778 |
| 8 | GO:0070482 | Response to oxygen levels | 0.000079 |
| 8 | GO:0007409 | Axonogenesis | 0.0000863 |
| 10 | GO:0019221 | Cytokine-mediated signaling pathway | 0.0000887 |
| 8 | GO:0045787 | Positive regulation of cell cycle | 0.0000918 |
| 5 | GO:0060191 | Regulation of lipase activity | 0.00012 |
| 6 | GO:0060491 | Regulation of cell projection assembly | 0.00013 |
| 10 | GO:0098771 | Inorganic ion homeostasis | 0.00015 |
| 4 | GO:1902743 | Regulation of lamellipodium organization | 0.00016 |
| 6 | GO:0043123 | Positive regulation of i-kappab kinase/nf-kappab signaling | 0.00018 |
| 4 | GO:0034446 | Substrate adhesion-dependent cell spreading | 0.00019 |
| 6 | GO:0060326 | Cell chemotaxis | 0.00023 |
| 4 | GO:0043525 | Positive regulation of neuron apoptotic process | 0.00034 |
| 7 | GO:0048871 | Multicellular organismal homeostasis | 0.00044 |
| 9 | GO:0030855 | Epithelial cell differentiation | 0.00055 |
| 5 | GO:0030217 | T cell differentiation | 0.00057 |
| 3 | GO:1905208 | Negative regulation of cardiocyte differentiation | 0.00059 |
| 6 | GO:0002833 | Positive regulation of response to biotic stimulus | 0.00061 |
| 5 | GO:0033135 | Regulation of peptidyl-serine phosphorylation | 0.00063 |
| 7 | GO:0045862 | Positive regulation of proteolysis | 0.00065 |
| 9 | GO:0043269 | Regulation of ion transport | 0.00068 |
| 6 | GO:0007611 | Learning or memory | 0.00077 |
| 2 | GO:0032707 | Negative regulation of interleukin-23 production | 0.00078 |
| 4 | GO:0032677 | Regulation of interleukin-8 production | 0.00084 |
| 3 | GO:0030225 | Macrophage differentiation | 0.00098 |
| 13 | GO:0045893 | Positive regulation of transcription, dna-templated | 0.001 |
| 6 | GO:0001818 | Negative regulation of cytokine production | 0.0011 |
| 4 | GO:0046651 | Lymphocyte proliferation | 0.0011 |
| 4 | GO:1901224 | Positive regulation of nik/nf-kappab signaling | 0.0011 |
| 3 | GO:0038179 | Neurotrophin signaling pathway | 0.0012 |
| 6 | GO:1902105 | Regulation of leukocyte differentiation | 0.0012 |
| 3 | GO:0050690 | Regulation of defense response to virus by virus | 0.0013 |
| 5 | GO:0031345 | Negative regulation of cell projection organization | 0.0015 |
| 7 | GO:0002683 | Negative regulation of immune system process | 0.0017 |
| 2 | GO:0033590 | Response to cobalamin | 0.0018 |
| 4 | GO:0048771 | Tissue remodeling | 0.0018 |
| 6 | GO:0007264 | Small gtpase mediated signal transduction | 0.002 |
| 4 | GO:0003015 | Heart process | 0.0022 |
| 4 | GO:0048259 | Regulation of receptor-mediated endocytosis | 0.0022 |
| 4 | GO:0007041 | Lysosomal transport | 0.0023 |
| 2 | GO:0032613 | interleukin-10 production | 0.0023 |
| 2 | GO:0090244 | Wnt signaling pathway involved in somitogenesis | 0.0023 |
| 3 | GO:0043491 | Protein kinase b signaling | 0.0024 |
| 3 | GO:0090049 | Regulation of cell migration involved in sprouting angiogenesis | 0.0024 |
| 6 | GO:0048638 | Regulation of developmental growth | 0.0025 |
| 3 | GO:0014911 | Positive regulation of smooth muscle cell migration | 0.0026 |
| 3 | GO:0033619 | Membrane protein proteolysis | 0.0026 |
| 3 | GO:1904646 | Cellular response to amyloid-beta | 0.0026 |
| 4 | GO:0032526 | Response to retinoic acid | 0.0027 |
| 7 | GO:0034330 | Cell junction organization | 0.0027 |
| 3 | GO:0045740 | Positive regulation of dna replication | 0.0027 |
| 2 | GO:0008354 | Germ cell migration | 0.003 |
| 10 | GO:0008219 | Cell death | 0.0032 |
| 6 | GO:0050727 | Regulation of inflammatory response | 0.0032 |
| 3 | GO:0043277 | Apoptotic cell clearance | 0.0033 |
| 3 | GO:0045746 | Negative regulation of notch signaling pathway | 0.0033 |
| 3 | GO:0014003 | Oligodendrocyte development | 0.0036 |
| 6 | GO:0032386 | Regulation of intracellular transport | 0.0036 |
| 14 | GO:0008104 | Protein localization | 0.0043 |
| 2 | GO:0051964 | Negative regulation of synapse assembly | 0.0045 |
| 2 | GO:0023035 | CD40 signaling pathway | 0.0053 |
| 6 | GO:0040007 | Growth | 0.0054 |
| 3 | GO:0022029 | Telencephalon cell migration | 0.0061 |
| 3 | GO:0032663 | Regulation of interleukin-2 production | 0.0061 |
| 5 | GO:0030336 | Negative regulation of cell migration | 0.0064 |
| 6 | GO:0002697 | Regulation of immune effector process | 0.007 |
| 4 | GO:0050921 | Positive regulation of chemotaxis | 0.007 |
| 2 | GO:0097011 | Cellular response to granulocyte macrophage colony-stimulating factor stimulus | 0.007 |
| 4 | GO:0043524 | Negative regulation of neuron apoptotic process | 0.0071 |
| 4 | GO:0030902 | Hindbrain development | 0.008 |
| 4 | GO:0051147 | Regulation of muscle cell differentiation | 0.008 |
| 10 | GO:0007186 | G protein-coupled receptor signaling pathway | 0.0082 |
| 4 | GO:0000187 | Activation of mapk activity | 0.0085 |
| 2 | GO:0007494 | Midgut development | 0.009 |
| 2 | GO:0032530 | Regulation of microvillus organization | 0.009 |
| 9 | GO:0032269 | Negative regulation of cellular protein metabolic process | 0.0092 |
| 4 | GO:2001236 | Regulation of extrinsic apoptotic signaling pathway | 0.0092 |
| 5 | GO:1903522 | Regulation of blood circulation | 0.0095 |
| 6 | GO:0051346 | Negative regulation of hydrolase activity | 0.0096 |
| 4 | GO:0019722 | Calcium-mediated signaling | 0.0099 |
| 2 | GO:0050966 | Detection of mechanical stimulus involved in sensory perception of pain | 0.0099 |
| 3 | GO:0014015 | Positive regulation of gliogenesis | 0.0109 |
| 3 | GO:0018107 | Peptidyl-threonine phosphorylation | 0.0109 |
| 2 | GO:0060263 | Regulation of respiratory burst | 0.011 |
| 5 | GO:0010769 | Regulation of cell morphogenesis involved in differentiation | 0.0117 |
| 4 | GO:0010469 | Regulation of signaling receptor activity | 0.0119 |
| 2 | GO:0010715 | Regulation of extracellular matrix disassembly | 0.012 |
| 2 | GO:0043217 | Myelin maintenance | 0.012 |
| 2 | GO:0046209 | Nitric oxide metabolic process | 0.0132 |
| 6 | GO:0001501 | Skeletal system development | 0.0147 |
| 4 | GO:0071248 | Cellular response to metal ion | 0.0158 |
| 3 | GO:0050871 | Positive regulation of b cell activation | 0.016 |
| 4 | GO:0046890 | Regulation of lipid biosynthetic process | 0.0169 |
| 3 | GO:0035023 | Regulation of rho protein signal transduction | 0.0174 |
| 3 | GO:0110110 | Positive regulation of animal organ morphogenesis | 0.0177 |
| 6 | GO:0007507 | Heart development | 0.0178 |
| 2 | GO:0032288 | Myelin assembly | 0.0182 |
| 2 | GO:0048799 | Animal organ maturation | 0.0182 |
| 4 | GO:0048872 | Homeostasis of number of cells | 0.0186 |
| 2 | GO:0036473 | Cell death in response to oxidative stress | 0.0196 |
| 3 | GO:0010522 | Regulation of calcium ion transport into cytosol | 0.0238 |
| 3 | GO:0045807 | Positive regulation of endocytosis | 0.0249 |
| 2 | GO:0003401 | Axis elongation | 0.0252 |
| 2 | GO:0044319 | Wound healing, spreading of cells | 0.0252 |
| 6 | GO:0048598 | Embryonic morphogenesis | 0.0258 |
| 2 | GO:0070723 | Response to cholesterol | 0.0265 |
| 5 | GO:0031331 | Positive regulation of cellular catabolic process | 0.0287 |
| 2 | GO:0042310 | Vasoconstriction | 0.0317 |
| 3 | GO:0098693 | Regulation of synaptic vesicle cycle | 0.0317 |
| 2 | GO:2000108 | Positive regulation of leukocyte apoptotic process | 0.0317 |
| 2 | GO:0001774 | Microglial cell activation | 0.0349 |
| 2 | GO:0007202 | Activation of phospholipase c activity | 0.0383 |
| 2 | GO:0043403 | Skeletal muscle tissue regeneration | 0.0383 |
| 4 | GO:0042493 | Response to drug | 0.0481 |
| 2 | GO:0045058 | T cell selection | 0.0492 |

**Supplementary Table 11 -** Gene Ontology (GO) Cellular Components data enrichment analysis for terms with FDR P value <0.05 related to the cluster derived from the targets of the upregulated miRNAs.

| **Number of Genes** | **Term Name** | **Description** | **FDR value** |
| --- | --- | --- | --- |
| 37 | GO:0005768 | Endosome | 1.69E-37 |
| 18 | GO:0005769 | Early endosome | 3.65E-17 |
| 22 | GO:0070161 | Anchoring junction | 1.49E-16 |
| 14 | GO:0045121 | Membrane raft | 1.82E-12 |
| 14 | GO:0098552 | Side of membrane | 6.61E-10 |
| 24 | GO:0042995 | Cell projection | 8.76E-10 |
| 14 | GO:0098797 | Plasma membrane protein complex | 9.05E-10 |
| 11 | GO:0005770 | Late endosome | 1.94E-09 |
| 15 | GO:0030659 | Cytoplasmic vesicle membrane | 5.67E-09 |
| 14 | GO:0005773 | Vacuole | 8.44E-08 |
| 11 | GO:0031252 | Cell leading edge | 0.000000137 |
| 7 | GO:0042383 | Sarcolemma | 0.00000106 |
| 10 | GO:0045177 | Apical part of cell | 0.00000134 |
| 13 | GO:0036477 | Somatodendritic compartment | 0.00000152 |
| 7 | GO:0055037 | Recycling endosome | 0.00000675 |
| 8 | GO:0030139 | Endocytic vesicle | 0.0000124 |
| 11 | GO:0048471 | Perinuclear region of cytoplasm | 0.0000166 |
| 4 | GO:0097386 | Glial cell projection | 0.0000428 |
| 6 | GO:0031901 | Early endosome membrane | 0.000055 |
| 5 | GO:0042470 | Melanosome | 0.00011 |
| 3 | GO:0001891 | Phagocytic cup | 0.00089 |
| 5 | GO:0030136 | Clathrin-coated vesicle | 0.0017 |
| 5 | GO:0030027 | Lamellipodium | 0.0021 |
| 3 | GO:0032154 | Cleavage furrow | 0.0054 |
| 4 | GO:0031902 | Late endosome membrane | 0.0058 |
| 3 | GO:0101003 | ficolin-1-rich granule membrane | 0.0077 |
| 3 | GO:0005771 | Multivesicular body | 0.0079 |
| 4 | GO:0042582 | Azurophil granule | 0.0084 |
| 4 | GO:0009898 | Cytoplasmic side of plasma membrane | 0.0086 |
| 7 | GO:0030424 | Axon | 0.0104 |
| 3 | GO:0030670 | Phagocytic vesicle membrane | 0.0119 |
| 2 | GO:0001772 | Immunological synapse | 0.0499 |

**Supplementary Table 12 -** Gene Ontology (GO) Molecular Function data enrichment analysis for terms with FDR P value <0.05 related to the cluster derived from the targets of the upregulated miRNAs.

| **Number of Genes** | **Term Name** | **Description** | **FDR value** |
| --- | --- | --- | --- |
| 8 | GO:0004713 | Protein tyrosine kinase activity | 0.000000814 |
| 6 | GO:0015026 | Coreceptor activity | 0.00000118 |
| 18 | GO:0042802 | Identical protein binding | 0.0000178 |
| 6 | GO:0051117 | ATPase binding | 0.0000178 |
| 9 | GO:0019904 | Protein domain specific binding | 0.0034 |
| 3 | GO:0070325 | Lipoprotein particle receptor binding | 0.0043 |
| 6 | GO:0031625 | Ubiquitin protein ligase binding | 0.0055 |
| 7 | GO:0050839 | Cell adhesion molecule binding | 0.0164 |
| 8 | GO:0008289 | Lipid binding | 0.0222 |
| 6 | GO:0003779 | Actin binding | 0.0319 |
| 2 | GO:0005041 | Low-density lipoprotein particle receptor activity | 0.033 |

**Supplementary Table 13 -** KEGG pathways enrichment analysis for terms with FDR P value <0.05 related to the cluster derived from the targets of the upregulated miRNAs.

| **Number of Genes** | **Term Name** | **Description** | **FDR value** |
| --- | --- | --- | --- |
| 14 | hsa05205 | Proteoglycans in cancer | 7.05E-15 |
| 15 | hsa05200 | Pathways in cancer | 7.14E-11 |
| 10 | hsa04015 | Rap1 signaling pathway | 4.53E-09 |
| 8 | hsa05135 | Yersinia infection | 4.24E-08 |
| 9 | hsa04144 | Endocytosis | 0.000000192 |
| 6 | hsa05235 | PD-L1 expression and PD-1 checkpoint pathway in cancer | 0.00000202 |
| 7 | hsa05161 | Hepatitis B | 0.00000228 |
| 7 | hsa05152 | Tuberculosis | 0.00000305 |
| 5 | hsa04928 | Parathyroid hormone synthesis, secretion and action | 0.0000691 |
| 4 | hsa05144 | Malaria | 0.0000691 |
| 4 | hsa04370 | VEGF signaling pathway | 0.00012 |
| 5 | hsa04514 | Cell adhesion molecules | 0.00018 |
| 5 | hsa04072 | Phospholipase D signaling pathway | 0.00022 |
| 5 | hsa05206 | MicroRNAs in cancer | 0.00031 |
| 6 | hsa05165 | Human papillomavirus infection | 0.00069 |
| 5 | hsa04060 | Cytokine-cytokine receptor interaction | 0.0026 |
| 4 | hsa05160 | Hepatitis C | 0.0026 |
| 3 | hsa05140 | Leishmaniasis | 0.0031 |
| 3 | hsa04721 | Synaptic vesicle cycle | 0.0035 |
| 2 | hsa04672 | Intestinal immune network for IgA production | 0.0191 |

**Supplementary Table 14 -** Reactome Pathways enrichment analysis for terms with FDR P value <0.05 related to the cluster derived from the targets of the upregulated miRNAs.

| **Number of Genes** | **Term Name** | **Description** | **FDR value** |
| --- | --- | --- | --- |
| 14 | HSA-422475 | Axon guidance | 1.68E-08 |
| 11 | HSA-5663202 | Diseases of signal transduction by growth factor receptors and second messengers | 0.000000473 |
| 6 | HSA-388841 | Costimulation by the CD28 family | 0.00000239 |
| 4 | HSA-400685 | Sema4D in semaphorin signaling | 0.0000449 |
| 7 | HSA-195258 | RHO GTPase Effectors | 0.00029 |
| 3 | HSA-5218921 | VEGFR2 mediated cell proliferation | 0.00081 |
| 3 | HSA-1250196 | SHC1 events in ERBB2 signaling | 0.0011 |
| 3 | HSA-397795 | G-protein beta:gamma signalling | 0.0027 |
| 2 | HSA-173107 | Binding and entry of HIV virion | 0.0029 |
| 8 | HSA-5653656 | Vesicle-mediated transport | 0.0045 |
| 3 | HSA-437239 | Recycling pathway of L1 | 0.0071 |
| 5 | HSA-1474244 | Extracellular matrix organization | 0.0155 |
| 3 | HSA-9679191 | Potential therapeutics for SARS | 0.0203 |
| 4 | HSA-913531 | Interferon Signaling | 0.0229 |
| 2 | HSA-5668599 | RHO GTPases Activate NADPH Oxidases | 0.0308 |
| 2 | HSA-5654733 | Negative regulation of FGFR4 signaling | 0.0418 |

**Supplementary Figure 1 –** Inhibition and induction of cav1 and cav2 expression in PCa cell lines. A – mRNA levels of Cav1 and Cav2 after transfection with siCav1, siCav2, both siCav1 and siCav2 and Ctrl- in PC-3 cells. B – Fluorescence microscopy image of PC-3 cells after incubation with BLOCK-iTTM Alexa FluorTM Red Fluorescent Control used as a positive control of transfection (OLIMPUS IX51, 10x). C – mRNA levels of Cav1 and Cav2 after transfection with siCav1, siCav2, both siCav1 and siCav2 and Ctrl- in Du-145 cells. D – Fluorescence microscopy image of Du-145 cells after incubation with BLOCK-iTTM Alexa FluorTM Red Fluorescent Control used as a positive control of transfection in PC-3 cells (OLIMPUS IX51, 10x). E - mRNA levels of Cav1 and Cav2 after transfection with Cav1 plasmid, Cav2 plasmid, and both Cav1 and Cav2 plasmid in LNCaP cells.


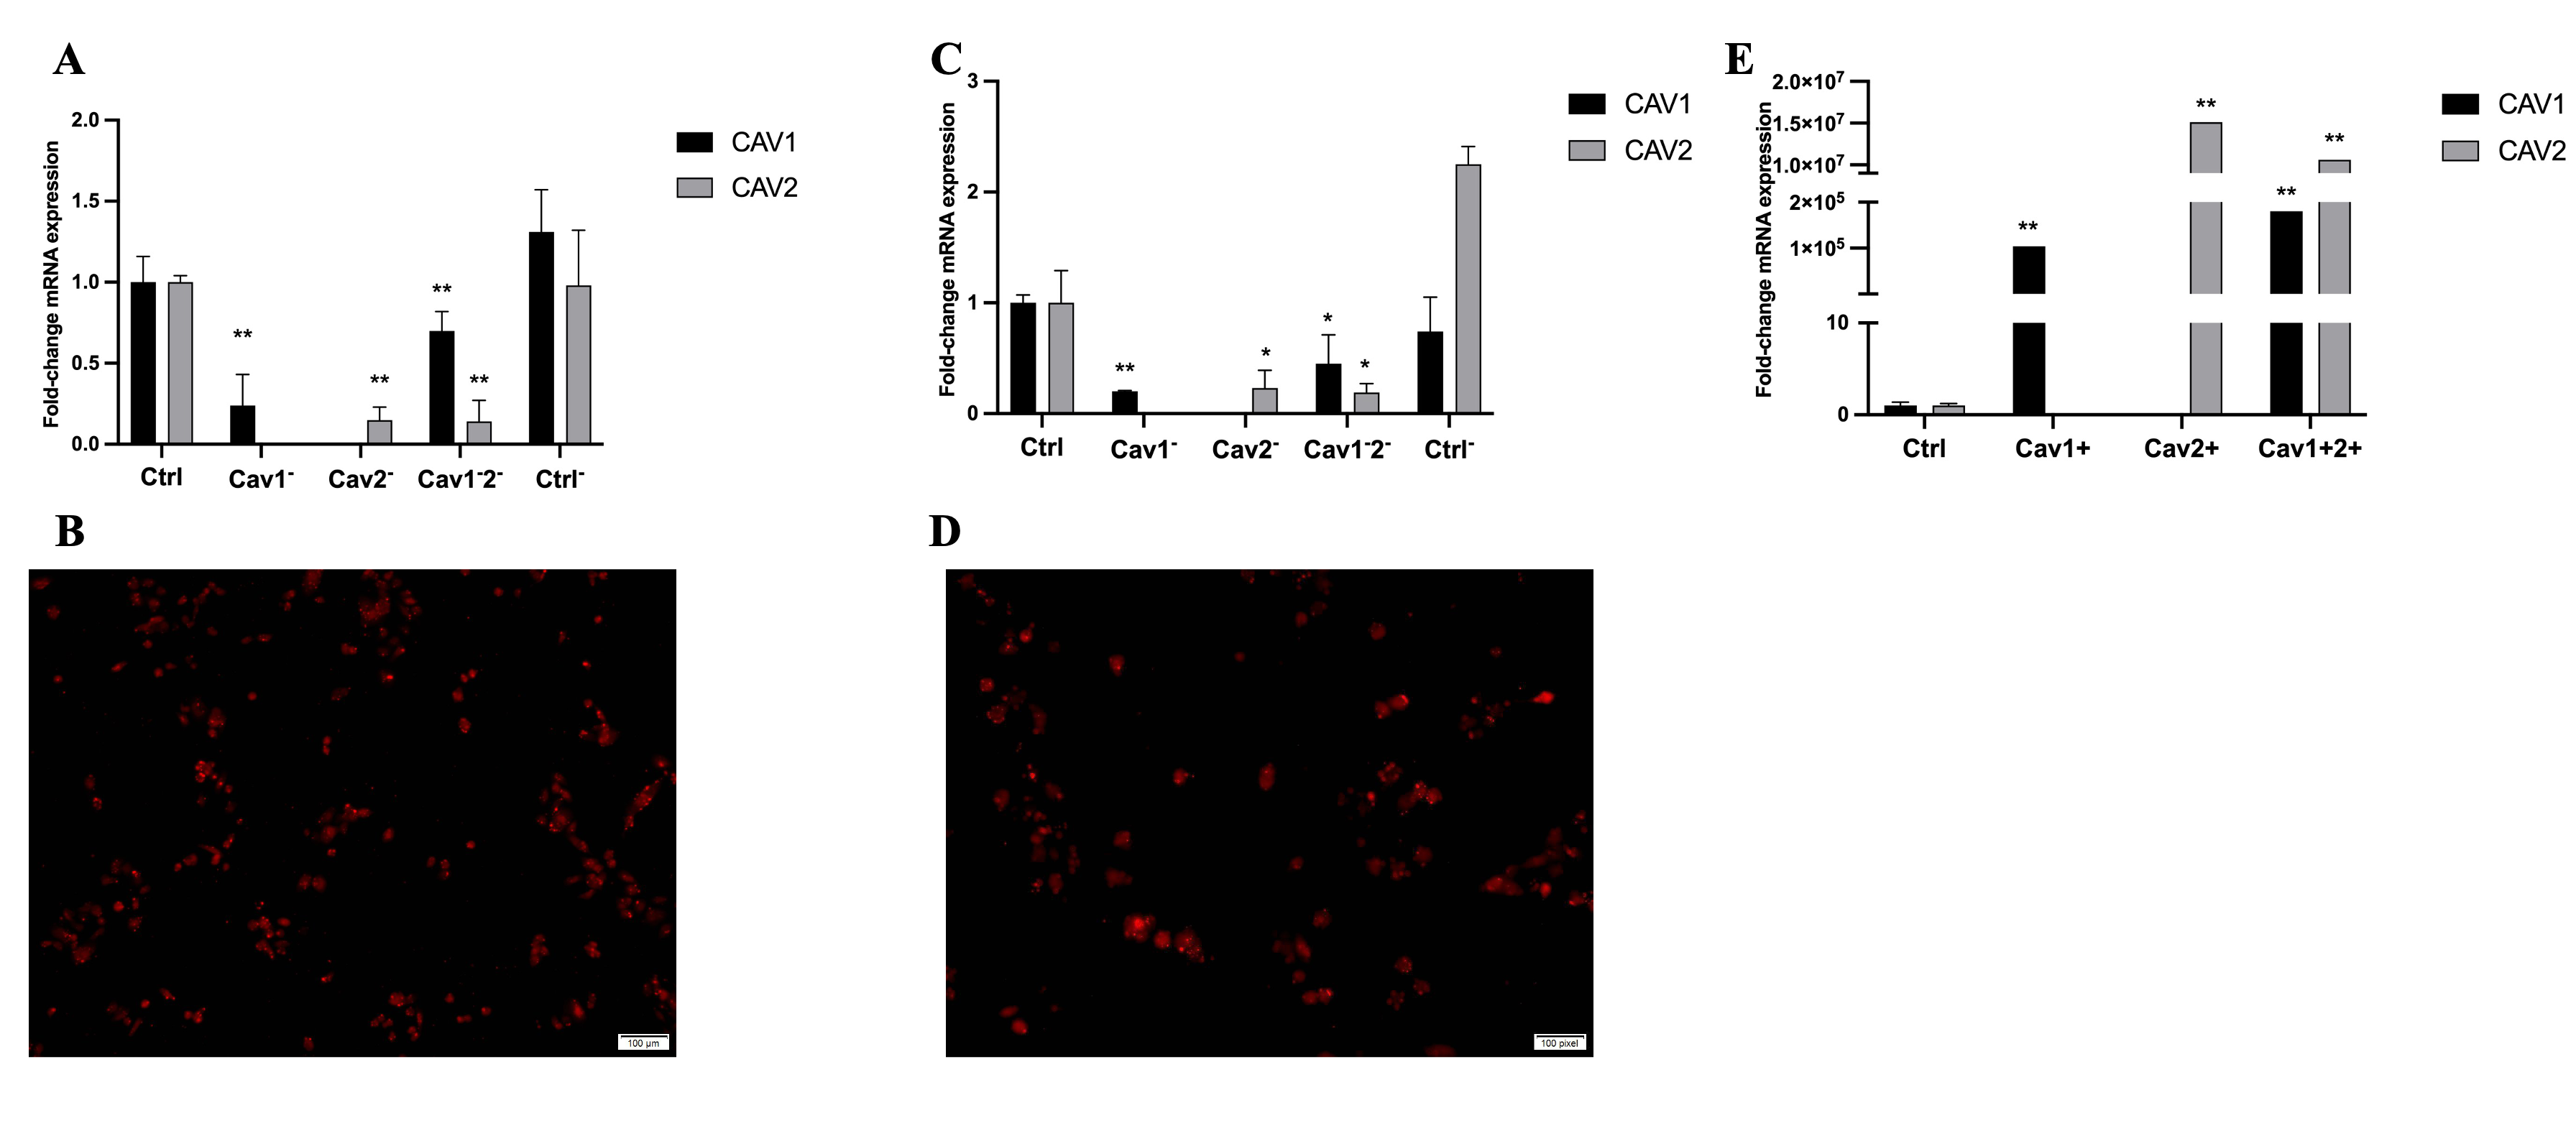

Supplement: Supplementary file 1 [file get_supplementary_file.php]
